# Supplementary material for: Identification of the interplay between SOX9 and S100P in the metastasis and invasion of colon carcinoma
Source: PubMed Central journal article supplement (PMC4653034; doi:10.18632/oncotarget.3967), 2015-05-13
Supplement: oncotarget-06-20672-s001.pdf [file oncotarget-06-20672-s001.pdf]

## SUPPLEMENTARY DATA

### Immunofluorescence

Immunofluorescence was used to determine the localization of SOX9 in colon cancer cells. Cells were seeded at  $5 \times 10^4$  cells per 13-mm coverslip in a 24-well plate and cultured overnight. The cells were then fixed in 4% paraformaldehyde and permeabilized with 0.1% Triton X-100. After blocking in 1% bovine serum albumin, the cells were incubated with mouse anti-SOX9 (Abcam). The secondary antibodies included anti-mouse IgG (H+L) F(ab')<sub>2</sub> fragment (Alexa Fluor 488 Conjugate) and anti-rabbit IgG (H+L) F(ab')<sub>2</sub> fragment (Alexa Fluor<sup>®</sup> 555 Conjugate; Cell Signaling Technology). DNA was stained with 1  $\mu$ g/mL 4',6-diamidino-2-phenylindole (DAPI; Cell Signaling Technology). A series of optical sections were acquired and projected to single images using an Olympus FV10i-W.

### Electrophoretic mobility shift assay (EMSA)

Nuclear proteins from the HCT116 cell line were extracted using a nucleoprotein extraction kit (BestBio). The sequences of the *S100P* gene probes were designed based on the predicted transcription factor-binding site (TFBS) of SOX9 for the *S100P* gene. EMSAs were performed according to standard protocols and visualized using a Chemiluminescent EMSA Kit (Beyotime Biotechnology). The specificity of binding was examined by competition with 100-fold excess of unlabeled probe and mutant probe. For supershift assays, the nuclear extract was incubated at room temperature for 20 min with a biotin-labeled probe and antibodies against SOX9 (Abcam). Probe/nuclear protein complexes were separated by electrophoresis on a non-denaturing PAGE gel, and the resolved products were transferred onto a positively charged nylon membrane (Millipore). Bands were detected with the Luminata Chemiluminescent Detection Kit (Millipore).

### Chromatin immunoprecipitation (ChIP) assay

Quantitative chromatin immunoprecipitation (Q-ChIP) was performed following the protocol

from an EZ-ChIP Chromatin Immunoprecipitation Kit (Millipore). The protein/DNA complex was isolated from the HCT116 cell line and sheared by sonication to lengths of 200 to 1,000 base pairs. Anti-SOX9 (Abcam) was used to precipitate the complex, and normal IgG was used as the negative control. The DNA-protein crosslinks were reversed by heating at 65°C for 4 h. After phenol and chloroform extraction, DNA was purified by ethanol precipitation. Real-time PCR analysis was performed using the selected primers.

### Dual-luciferase reporter assay

To generate luciferase reporter plasmids containing the S100P promoter sequences, DNA fragments containing wild type (S100P-promoter-WT) or mutant (S100P-promoter-MU) S100P promoter sequence (nucleotide from -1500 to +55) were amplified using genomic DNA. The PCR products were cloned into the pGL3-promoter vector by Genechem (Shanghai, China). The mutant sequence of the S100P promoter replaced the predicted TFBS of "AAACAAAAG" to "ACGCAGCAT". To construct SOX9-overexpressing plasmids, human SOX9 cDNA was inserted into pMSCV-GFP-IRES. The activity of the reporter was measured using a Dual-Luciferase<sup>™</sup> reporter system (Promega). HCT-116 cancer cells were seeded at a density of  $2 \times 10^4$  cells in a 24-well plate. Cells were cotransfected with 0, 0.2 or 0.4  $\mu$ g of SOX9-overexpressing vector and 0.2  $\mu$ g of S100P-promoter-WT or S100P-promoter-MU. The transfection was performed using X-tremegene HP (Roche) according to the manufacturer's protocol. After incubation for 24 h, the cells were lysed. Luciferase activity was determined by the Dual-Luciferase Reporter Assay System as described in the manufacturer's instructions (Promega). *Renilla* luciferase was used to normalize transfection efficiency.



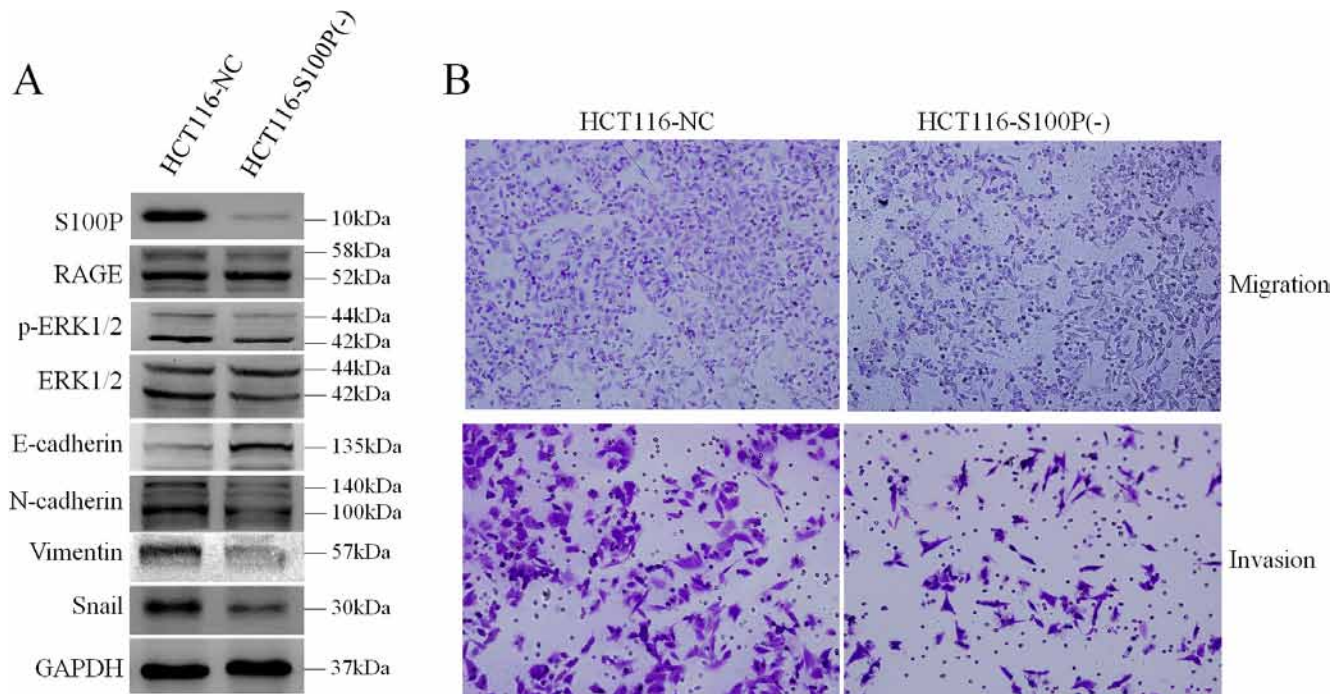

**Supplementary Figure S2: Effects of S100P knockdown on EMT, invasion and metastasis.** **A.** Markers of EMT were detected using Western blot analysis in the HCT116-S100P(-) cell line (cell line with stable lentiviral suppression of S100P expression). **B.** The invasion and metastasis of HCT116-S100P(-) cells compared with negative control cells (HCT116-NC) were measured by Transwell and Borden chamber assays.

**Supplementary Table S1. Primer sequences used for the ChIP assay****Oligo (dT) primers for Q-PCR in Q-ChIP**

|                |                             |
|----------------|-----------------------------|
| Forward primer | 5'-TCTGGGTTTATGGCAGGGTTT-3' |
| Reverse primer | 5'-GAGCCTTTGTGCCGTCTAAGC-3' |

**Supplementary Table S2. The sequence of Oligo(dT) primers for Q-PCR and siRNAs for SOX9 and S100P interference**

**Oligo (dT) primers for Q-PCR**

|                                                           |                                                             |
|-----------------------------------------------------------|-------------------------------------------------------------|
| S100P- Forward                                            | 5'-TGCAGAGTGGAAAAGACAAGGAT-3'                               |
| S100P- Reverse                                            | 5'-CCACCTGGGCATCTCCATT-3'                                   |
| SOX9- Forward                                             | 5'-GGAGATGAAATCTGTTCTGGGAATG-3'                             |
| SOX9- Reverse                                             | 5'-TTGAAGGTAACTGCTGGTGTCTG-3'                               |
| Oligo (dT) primers for Q-PCR in Q-ChIP                    |                                                             |
| Forward primer                                            | 5'-TCTGGGTTTTATGGCAGGGTTT-3'                                |
| Reverse primer                                            | 5'-GAGCCTTTGTGCCGTCTAAGC-3'                                 |
| siRNAs for SOX9 and S100P for constructing the lentivirus |                                                             |
| SOX9-siR-2167                                             | 5'-GCGAAAUCAACGAGAAACUTT-3'<br>5'-AGUUUCUCGUUGAUUUCGCTT-3'  |
| S100P-siR-250                                             | 5'-CCGUGGAUAAAUUGCUCUAATT-3'<br>5'-UUGAGCAAUUUAUCCACGGTT-3' |

**Supplementary Table S3. The clinicopathological characteristics of clinical samples in TMA**
